# Supplementary material for: Return to driving following surgery to the upper limb: a scoping review protocol
Source: HighWire-hosted journal article supplement (doi:10.1136/bmjopen-2022-070618), 2023-06-01
Supplement: bmjopen-2022-070618supp002_data_supplement.pdf [file bmjopen-2022-070618supp002_data_supplement.pdf]

## Appendix II: Data Extraction Instrument

|                                                                                          |  |
|------------------------------------------------------------------------------------------|--|
| <b>1. Source Details</b>                                                                 |  |
| Citation details (eg author/s, dates, title, journal, volume, issue, pages)              |  |
| Type of source or study (eg peer reviewed manuscript, technical report, grey literature) |  |
| Geographical location                                                                    |  |
| Participant characteristics (age, sex) and sample size                                   |  |
| Aim / purpose / objective                                                                |  |
| <b>2. Inclusion / exclusion criteria</b>                                                 |  |
| Population                                                                               |  |
| Concept                                                                                  |  |
| Context / environment of research                                                        |  |
| <b>3. Details / results extracted from source</b>                                        |  |
| Common themes                                                                            |  |
| Outcome measures used                                                                    |  |
| Recommendations                                                                          |  |
| Limitations                                                                              |  |
